# Supplementary material for: Regulation of the Cell Cycle by ncRNAs Affects the Efficiency of CDK4/6 Inhibition
Source: MDPI journal article supplement (doi:10.3390/ijms24108939), 2023-05-18
Supplement: s1 [file s1]

# Regulation of Cell Cycle by ncRNA Affects the Efficiency of CDK4/6 Inhibitions

Qingyi Hu and Tao Huang\*

**Table S1.** CDK4/6 inhibitions (palbociclib, abemaciclib, and ribociclib) treatment clinical trails in human malignant tumors.

| Trail ID                       | Phase  | Enrolled Cancer patients                                              | N    | Regimen                                                                                            |
|--------------------------------|--------|-----------------------------------------------------------------------|------|----------------------------------------------------------------------------------------------------|
| NCT03709680                    | I/II   | relapsed or refractory solid tumor or EWS                             | 184  | Palbociclib + Temozolomide + Irinotecan v.s. Temozolomide + Irinotecan                             |
| SERENA-6<br>(NCT04964934)      | III    | HR-positive, HER2-negative MBC with detectable ESR1 mutation          | 300  | AZD9833 + CDK4/6i (Palbociclib or Abemaciclib) v.s. AI (Anastrozole or Letrozole) + CDK4/6i        |
| NCT02738866                    | II     | HR-positive, HER2-negative BC metastatic or locally advanced          | 60   | Palbociclib + Fulvestrant                                                                          |
| INCMGA00012<br>(NCT04438824)   | II     | Liposarcoma metastatic or unresectable                                | 42   | Palbociclib + INCMGA00012                                                                          |
| NCT02778685                    | II     | Metastatic Stage IV ER-positive BC                                    | 47   | Palbociclib + Pembrolizumab + Letrozole                                                            |
| VIKTORIA-1<br>(NCT05501886)    | III    | Advanced or Metastatic HR-positive, HER2-negative BC                  | 701  | Palbociclib + Gedatolisib + Fulvestrant v.s. Gedatolisib + Fulvestrant                             |
| NCT05694871                    | II     | Advanced Dedifferentiated Liposarcoma                                 | 72   | Palbociclib v.s. Palbociclib + Cemiplimab                                                          |
| IBRANCE<br>(NCT04072952)       | I/II   | HR-positive, HER2-negative Locally Advanced or MBC                    | 215  | ARV-471 v.s. ARV-471 + Palbociclib                                                                 |
| NCT04191499                    | II/III | PIK3CA-Mutant, HR-positive, Her2-negative, Locally Advanced or MBC    | 400  | Inavolisib + Palbociclib + Fulvestrant v.s. Placebo + Palbociclib + Fulvestrant                    |
| NCT04711252                    | III    | ER-positive, HER2-negative BC and Not Received Any Systemic Treatment | 1342 | AZD9833 + Palbociclib v.s. Anastrozole + Palbociclib                                               |
| PALAVY<br>(NCT04841148)        | II     | Stage II-III BC                                                       | 96   | Avelumab v.s. Hydroxychloroquine v.s. Avelumab + Palbociclib v.s. Hydroxychloroquine + Palbociclib |
| NCT03446157                    | II     | wild-type metastatic colorectal cancer                                | 24   | Palbociclib + Cetuximab                                                                            |
| NCT03573648                    | II     | Stage I-III ER-positive BC                                            | 33   | Avelumab + ET + palbociclib v.s. Avelumab + ET                                                     |
| NCT05384119                    | I/II   | Metastatic HR-positive, HER2-negative BC                              | 53   | TTI-101 + Palbociclib + AI                                                                         |
| NCT02896335                    | II     | any solid tumor with Recurrent Brain Metastases                       | 30   | Palbociclib                                                                                        |
| NCT02760030                    | II     | Older Patients with HR-positive and inoperable BC                     | 37   | Fulvestrant + Palbociclib                                                                          |
| NCT03065062                    | I      | Advanced Solid Tumors or Lung, Pancreatic, or Head and Neck Cancer    | 96   | Palbociclib + Gedatolisib                                                                          |
| CAPItello-292<br>(NCT04862663) | III    | HR-positive, Her2-negative Locally Advanced, Unresectable or MBC      | 700  | Capivasertib + CDK4/6i + Fulvestrant v.s. Placebo + CDK4/6i + Fulvestrant                          |
| NCT03535506                    | II     | Stage 0-I Ductal BC in Situ                                           | 24   | Palbociclib before Surgery                                                                         |
| NCT03170206                    | I      | Advanced KRAS Mutant Non-small Cell Lung Cancer                       | 72   | Palbociclib v.s. Palbociclib + Binimetinib v.s. Binimetinib                                        |
| NCT04966481                    | III    | CDKN2A-altered, HPV-unrelated Recurrent or Metastatic HNSC            | 81   | Palbociclib + Cetuximab v.s. Cetuximab                                                             |

|                              |      |                                                                                                                                                       |     |                                                                                                  |
|------------------------------|------|-------------------------------------------------------------------------------------------------------------------------------------------------------|-----|--------------------------------------------------------------------------------------------------|
| INTERACT<br>(NCT04256941)    | II   | HR-positive MBC with an ERS1 Activating Mutation                                                                                                      | 124 | Letrozole, Anastrozole, or Fulvestrant with CDK4/6i (Ribociclib, Palbociclib, Abemaciclib)       |
| NCT05069038                  | II   | Early-stage HR-positive, HER2/neu-negative BC                                                                                                         | 46  | Neoadjuvant Palbociclib + ET (letrozole and goserelin)                                           |
| MK-6482-024<br>(NCT05468697) | I/II | Advanced Renal Cell Carcinoma                                                                                                                         | 180 | Belzutifan (MK-6482) + Palbociclib v.s. Belzutifan                                               |
| HPOE<br>(NCT03685331)        | I/II | BRCA Mutation-Associated, HR-positive, HER2-negative ABC                                                                                              | 54  | Olaparib, Palbociclib, and Fulvestrant                                                           |
| NCT03132454                  | I    | Recurrent or Refractory Leukemia                                                                                                                      | 54  | Palbociclib, Sorafenib, Decitabine, and Dexamethasone                                            |
| NCT03454035                  | I    | Advanced or Refractory Solid Tumors or Metastatic Pancreatic Cancer or Metastatic Melanoma                                                            | 45  | Ulixertinib + Palbociclib                                                                        |
| RELPA2<br>(NCT04996160)      | I    | Relapsed or Refractory Acute Lymphoblastic Leukemia                                                                                                   | 22  | Palbociclib, Bortezomib, Dexamethasone, and Doxorubicin                                          |
| NCT03065387                  | I    | Refractory and Advanced or Metastatic Solid Tumors with EGFR Mutation/Amplification, HER2 Mutation/Amplification, or HER3/4 Mutation or KRAS Mutation | 120 | Neratinib, Everolimus, Palbociclib, or Trametinib                                                |
| NCT04870034                  | I    | Operable KRAS-positive Lung, Colorectal, or Pancreatic Cancer                                                                                         | 24  | Binimetinib and Palbociclib before Surgery                                                       |
| NCT04563507                  | II   | ER-positive MBC                                                                                                                                       | 102 | letrozole+palbociclib + SBRT                                                                     |
| Combo-MATCH<br>(NCT05554367) | II   | RAS-Mutant Cancers                                                                                                                                    | 199 | Palbociclib, Binimetinib                                                                         |
| NCT05665361                  | I/II | Advanced ccRCC or pRCC                                                                                                                                | 100 | Palbociclib, Sasanlimab                                                                          |
| NCT05627232                  | I    | Relapsed or Refractory AML                                                                                                                            | 15  | Palbociclib + CPX-351 + Tazemetostat                                                             |
| NCT05176288                  | II   | Advanced, Metastatic, or Unresectable Clear Cell Kidney Cancer                                                                                        | 25  | Avelumab, Axitinib, and Palbociclib                                                              |
| NCT03774472                  | I/II | ER-positive, HER2-negative BC                                                                                                                         | 54  | Hydroxychloroquine, Palbociclib, and Letrozole before Surgery                                    |
| NCT02523014                  | II   | Progressive Meningiomas                                                                                                                               | 124 | Vismodegib, FAK Inhibitor GSK2256098, Capivasertib, and Abemaciclib                              |
| NCT05169567                  | III  | HR-positive, HER2-negative BC that progressed or recurred after previous treatment                                                                    | 350 | Abemaciclib + Fulvestrant v.s. Fulvestrant + Placebo                                             |
| NCT03939897                  | I/II | HR-positive, HER2-negative stage IV BC                                                                                                                | 204 | Copanlisib + Abemaciclib + Fulvestrant                                                           |
| SARC041<br>(NCT04967521)     | III  | Advanced Dedifferentiated Liposarcoma                                                                                                                 | 108 | Abemaciclib v.s. Placebo                                                                         |
| NCT04751929                  | II   | Metastatic Castration Resistant Prostate Cancer                                                                                                       | 75  | Abemaciclib v.s. Abemaciclib + Atezolizumab                                                      |
| SERENA-6<br>(NCT04964934)    | III  | HR-positive, HER2-negative MBC With Detectable ESR1m Before Progression                                                                               | 300 | AZD9833 + CDK4/6i (Palbociclib or Abemaciclib) v.s. Anastrozole + CDK4/6i v.s. AZD9833 + Placebo |
| NCT04633239                  | I    | Recurrent Ovarian Cancer                                                                                                                              | 42  | Abemaciclib + Olaparib                                                                           |
| NCT03643510                  | II   | HR-positive Recurrent or Refractory Endometrial Cancer                                                                                                | 25  | Fulvestrant + Abemaciclib                                                                        |
| NCT05714072                  | I    | Myelofibrosis                                                                                                                                         | 18  | Ruxolitinib + Abemaciclib                                                                        |
| NCT05288166                  | III  | Metastatic Hormone-Sensitive Prostate Cancer                                                                                                          | 900 | Abemaciclib + Abiraterone                                                                        |
| NCT04393285                  | II   | Advanced stage, persistent or recurrent endometrioid endometrial cancer                                                                               | 50  | Abemaciclib + Letrozole                                                                          |
| NCT03675893                  | II   | Recurrent, Metastatic, or Resistant Endometrial Cancer                                                                                                | 60  | Abemaciclib, Letrozole, LY3023414, and Metformin                                                 |

|                           |      |                                                                                                         |     |                                                                          |
|---------------------------|------|---------------------------------------------------------------------------------------------------------|-----|--------------------------------------------------------------------------|
| NCT05095207               | I/II | Locally Advanced, Unresectable, or Metastatic AR-positive, HER2-negative BC                             | 60  | Abemaciclib + Bicalutamide                                               |
| NCT04975308               | III  | ER- positive, HER2-negative BC                                                                          | 60  | Abemaciclib + Bicalutamide                                               |
| NCT04040205               | II   | Bone and Soft Tissue Sarcoma                                                                            | 45  | Abemaciclib                                                              |
| NCT03979508               | II   | Surgically Resectable, Chemotherapy Resistant, TNBC                                                     | 200 | Abemaciclib v.s. Pembrolizumab + Abemaciclib                             |
| NCT04627064               | I    | Advanced Kidney Cancer                                                                                  | 40  | Abemaciclib v.s. Abemaciclib + MK-6482                                   |
| NCT02644460               | I    | Diffuse Intrinsic Pontine Glioma, Recurrent or Refractory Solid Tumors, or Malignant Brain Tumors       | 60  | Abemaciclib + Radiation                                                  |
| NCT05065411               | III  | ER-positive, HER2-negative MBC                                                                          | 186 | Abemaciclib + Enobosarm                                                  |
| AIM<br>(NCT04169074)      | II   | HPV-negative Stage I-IVA HNSC Undergoing Surgery                                                        | 20  | Abemaciclib                                                              |
| NCT03310879               | II   | Advanced Solid Tumors with CCND1/2/3 and CDK4/6 Genetic Alterations                                     | 38  | Abemaciclib                                                              |
| INSIGHT<br>(NCT02977780)  | II   | Brain Tumors after Biomarker Screening                                                                  | 250 | Abemaciclib, DNA-PK/TOR Kinase Inhibitor CC-115, Neratinib, or QBS10072S |
| NCT04791384               | I    | Brain Metastasis Due to HR-positive, HER2-negative BC                                                   | 44  | Abemaciclib + Elacestrant                                                |
| NCT05608252               | I/II | Metastatic or Locally Recurrent HR-positive, HER2-negative BC                                           | 63  | Abemaciclib, Avutometinib, and Fulvestrant                               |
| NCT04049227               | I    | Endometrial Cancer                                                                                      | 27  | Abemaciclib + Letrozole                                                  |
| NCT04010357               | II   | Rb Wild-Type Refractory or Relapsed Extensive Stage SCLC                                                | 29  | Abemaciclib                                                              |
| NCT03891784               | II   | Advanced, Refractory, and Unresectable Digestive System Neuroendocrine Tumors                           | 37  | Abemaciclib                                                              |
| ABBY<br>(NCT04523857)     | II   | BC                                                                                                      | 66  | Abemaciclib v.s. Abemaciclib + Hydroxychloroquine                        |
| NCT04534283               | II   | Advanced, Metastatic, or Unresectable Cancer Harboring Mutations in BRAF, RAF1, MEK1/2, ERK1/2, and NF1 | 35  | ERK1/2 Inhibitor LY3214996 + Abemaciclib                                 |
| NCT04545710               | II   | Stage IV or Recurrent NSCLC with EGFR Activating Mutations with Osimertinib Resistance                  | 18  | Osimertinib + Abemaciclib                                                |
| NCT04469764               | II   | Recurrent Ovarian or Endometrial Cancer                                                                 | 32  | Abemaciclib                                                              |
| RAD 1805<br>(NCT04298983) | II   | Localized High-Risk or Locally Advanced Prostate Cancer                                                 | 30  | Abemaciclib + ADT                                                        |
| NCT04614194               | II   | HR-positive BC                                                                                          | 60  | Neoadjuvant Letrozole + Abemaciclib v.s. Letrozole                       |
| NCT05524584               | II   | HR-positive, HER2-negative MBC                                                                          | 20  | Anastrozole, Fulvestrant, and Abemaciclib                                |
| NCT04750928               | I/II | NF1 Related Atypical Neurofibromas                                                                      | 50  | Abemaciclib                                                              |
| NCT05113537               | I/II | Metastatic Castrate Resistant Prostate Cancer                                                           | 30  | Abemaciclib before 177Lu-PSMA-617                                        |
| NCT05386108               | I/II | Brain Metastasis Due to HR-positive, HER2-negative BC                                                   | 106 | Abemaciclib + Elacestrant                                                |
| NCT04923542               | I/II | HR-positive, HER2-negative MBC                                                                          | 31  | Stereotactic Radiosurgery, Abemaciclib, and ET                           |
| NCT04941274               | I/II | HIV-Associated and HIV-negative Kaposi Sarcoma                                                          | 43  | Abemaciclib                                                              |
| NCT04238819               | I/II | Children and Young Adult Participants with Solid Tumors, Including Neuroblastoma                        | 117 | Abemaciclib, Irinotecan, Temozolomide, Dinutuximab, and GM-CSF           |
| NCT04616183               | I/II | Unresectable or Metastatic Colorectal Cancer                                                            | 46  | LY3214996 + Cetuximab v.s. LY3214996 + Cetuximab + Abemaciclib           |
| NCT05413304               | I    | Recurrent High-Grade Glioma                                                                             | 7   | Abemaciclib                                                              |

|                            |      |                                                                                                                 |     |                                                                 |
|----------------------------|------|-----------------------------------------------------------------------------------------------------------------|-----|-----------------------------------------------------------------|
| NCT04352777                | IV   | Locally Advanced, Unresectable or Metastatic ER-positive, HER2-negative BC                                      | 18  | ET and Abemaciclib                                              |
| NCT05372640                | I    | Adult and Pediatric Patients (12-17 years) with Metastatic or Unresectable NUT Carcinoma and Other Solid Tumors | 30  | ZEN003694 + Abemaciclib                                         |
| NCT04552769                | II   | Unresectable or Metastatic Anaplastic/Undifferentiated Thyroid Cancer                                           | 9   | Abemaciclib                                                     |
| NCT03285412                | II   | ER-positive BC                                                                                                  | 120 | Ribociclib                                                      |
| NCT03008408                | II   | Advanced or Recurrent Endometrial Carcinoma                                                                     | 87  | Everolimus + Letrozole + Ribociclib v.s. Everolimus + Letrozole |
| LEANORA<br>(NCT04657679)   | IV   | ABC in Race-Based Cohorts                                                                                       | 36  | Ribociclib                                                      |
| NCT05467891                | II   | Locoregional Recurrent, Resected HR-positive, HER2-negative BC                                                  | 200 | Ribociclib, ET                                                  |
| NCT03090165                | I/II | Advanced AR-positive TNBC                                                                                       | 37  | Ribociclib + Bicalutamide                                       |
| Charge<br>(NCT04315233)    | I    | Metastatic TNBC or Recurrent Platinum-Resistant Ovarian Cancer                                                  | 34  | Ribociclib + Belinostat                                         |
| NCT05508906                | I    | ABC or MBC                                                                                                      | 60  | Ribociclib + Alpelisib                                          |
| NCT03056833                | I    | Recurrent Ovarian, Fallopian Tube, or Primary Peritoneal Cancer                                                 | 35  | Ribociclib + Carboplatin + Paclitaxel                           |
| NCT05319873                | I/II | HER2-positive BC                                                                                                | 18  | Ribociclib, Tucatinib, and Trastuzumab                          |
| NCT03740334                | I    | Children and Young Adults with Relapsed or Refractory Acute Lymphoblastic Leukemia                              | 45  | Ribociclib + Everolimus + Dexamethasone                         |
| MONARCH 2<br>(NCT02107703) | III  | HR-positive, HER2-negative ABC                                                                                  | 669 | Abemaciclib + Fulvestrant                                       |
| MONARCH 3<br>(NCT02246621) | III  | HR-positive, HER2-negative ABC previously treated with ET                                                       | 493 | Abemaciclib v.s. Abemaciclib + Fulvestrant                      |

Abbreviations: N, actual or estimated enrollment number; EWS, Ewing sarcoma; HR, hormone receptor; HER2, human epidermal growth factor receptor 2; MBC, metastatic breast cancer; BC, breast cancer; ER, estrogen receptor; HNSC, Head and Neck Squamous Cell Carcinoma; ccRCC, Clear Cell Renal Cell Carcinoma; pRCC, Papillary Renal Cell Carcinoma; AML, Acute Myeloid Leukemia; AR, Androgen Receptor; TNBC, Triple Negative Breast Cancer; SCLC, Small Cell Lung Cancer; NSCLC, Non-small Cell Lung Cancer; NF1, Neurofibromatosis Type I; ET, Endocrine therapy; AI, aromatase inhibitor; CDK4/6i, CDK4/6 inhibitor; SBRT, Stereotactic Body Radiation Therapy; ADT, Androgen Deprivation Therapy; ABC, advanced breast cancer.
